# Supplementary material for: The Phylogeography of Deciduous Tree Ulmus macrocarpa (Ulmaceae) in Northern China
Source: MDPI journal article supplement (doi:10.3390/plants13101334), 2024-05-12
Supplement: s1 [file s1]

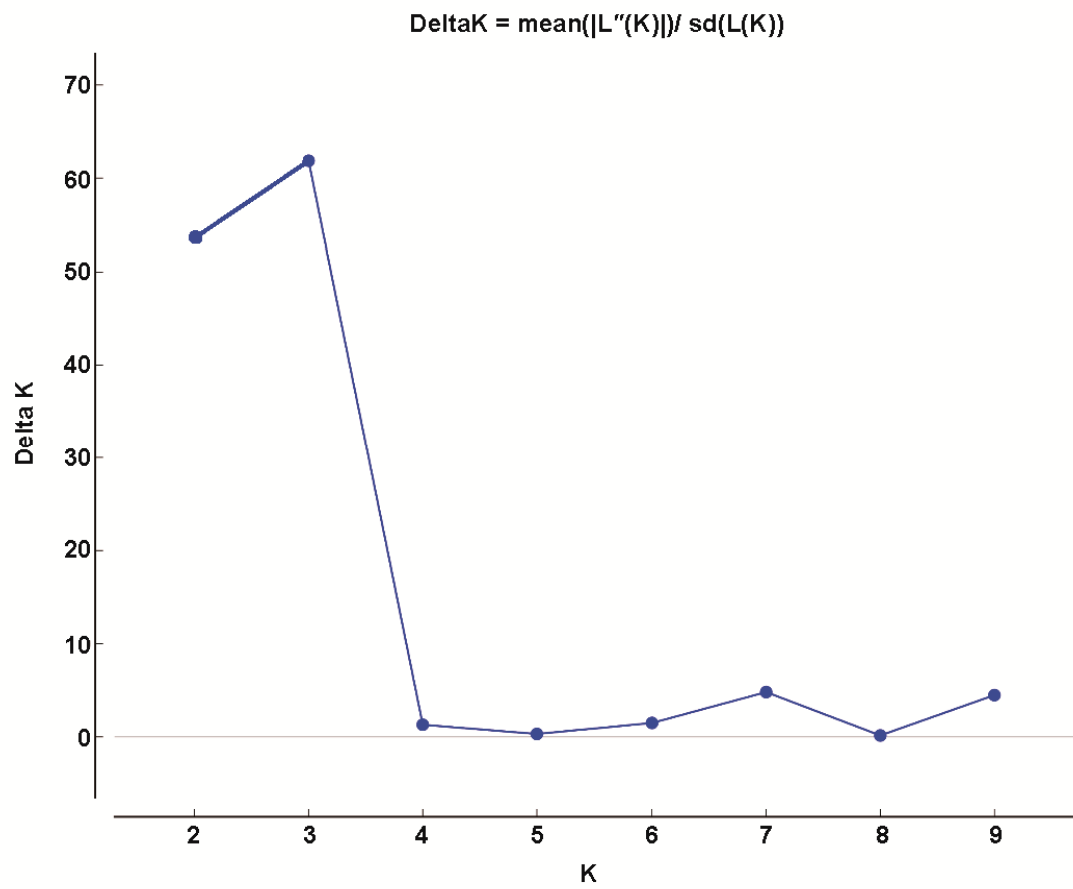

**Figure S1.** The  $\Delta K$  plot of structure analysis indicated that the optimal grouping number was  $K = 3$ , followed by  $K = 2$ .
