# Supplementary material for: The Phylogeography of Deciduous Tree Ulmus macrocarpa (Ulmaceae) in Northern China
Source: Plants (Basel). 2024 May 12;13(10):1334. doi: 10.3390/plants13101334 (PMC11125379; doi:10.3390/plants13101334)
Supplement: Supplementary file 1 [file plants-13-01334-s001.zip › Supplementary Tables.xlsx]

## Sheet: Table S1
Table S1. Sampling location and genetic diversity estimation for U. macrocarpa populations
Populations	Sample size	Locations	Longtitude (E)	Latitude (N)	Altitude (m)	Haplotypes number	Haplotype diversity (Hd)	Nucleotide diversity (π)
KL	5	Kelan, Shanxi	111.58°	38.70°	1348	Hap1 (1), Hap2 (2), Hap3 (1), Hap4 (1)	0.9	0.0018
HCS	5	Heichashan, Shanxi	111.34°	38.25°	1588	Hap1 (1), Hap2 (1), Hap3 (1), Hap4 (2)	0.9	0.0018
ZJS	5	Zijinshan, Shanxi	110.9°	38.11°	1360	Hap3 (3), Hap4 (2)	0.6	0.0009
WTS	5	Wutaishan, Shanxi	113.25°	38.74°	1116	Hap1 (1), Hap2 (1), Hap4 (3)	0.7	0.0015
QLY	5	Qiliyu, Shanxi	111.59°	36.37°	1560	Hap4 (1), Hap5 (2), Hap6 (1), Hap7 (1)	0.9	0.0024
HLMKZ	5	Huanglongmukezhai, Shanxi	109.84°	35.58°	1098	Hap2 (1), Hap4 (3), Hap8 (1)	0.7	0.0048
YQS	5	Yunqiushan, Shanxi	111.00°	35.45°	1187	Hap2 (2), Hap4 (1), Hap8 (2)	0.8	0.0072
DGH	5	Dagouhe, Henan	112.47°	34.99°	358	Hap7 (2), Hap9 (2), Hap10 (1)	0.8	0.0015
MHS	5	Manhanshan, Inner Mongolia	112.29°	40.64°	1533	Hap7 (2), Hap8 (1), Hap9 (1), Hap11 (1)	0.9	0.006
DQG	5	Daqinggou, Inner Mongolia	122.16°	42.81°	255	Hap4 (1), Hap12 (1), Hap13 (1), Hap14 (2)	0.9	0.0039
DHS	5	Daheishan, Inner Mongolia	120.46°	42.02°	551	Hap15 (3), Hap16 (2)	0.6	0.0018
HLS	5	Heilongshan, Hebei	116.15°	41.33°	1527	Hap2 (1), Hap13 (3), Hap15 (1)	0.7	0.0033
QFS	5	Qianfoshan, Shandong	117.02°	36.63°	377	Hap13 (4), Hap14 (1)	0.4	0.0006
XWTS	5	Xiaowutaishan, Hebei	114.95°	39.94°	1333	Hap13 (3), Hap14 (1), Hap15 (1)	0.7	0.0012
BHS	5	Baihuanshan, Beijing	115.34°	39.5°	1179	Hap13 (3), Hap15 (2)	0.6	0.0009
SFS	5	Shangfangshan, Beijing	115.79°	39.67°	251	Hap7 (1), Hap13 (3), Hap14 (1)	0.7	0.0018
QS	5	Qianshan, Liaoning	123.11°	41.02°	264	Hap8 (3), Hap17 (2)	0.6	0.0063
SDLC	5	Sandaolinchang, Heilongjiang	129.99°	47.31°	250	Hap8 (3), Hap9 (1), Hap18 (1)	0.7	0.0039
HXLC	5	Hongxinglinchang, Heilongjiang	127.28°	45.53°	366	Hap8 (2), Hap11 (1), Hap14 (1), Hap18 (1)	0.9	0.0033
MDF	5	Mudanfeng, Heilongjiang	129.74°	44.46°	346	Hap8 (2), Hap11 (2), Hap18 (1)	0.8	0.0018
JH	5	Jiaohe, Jilin	127.34°	43.72°	275	Hap8 (4), Hap18 (1)	0.4	0.0006
SHHLC	5	Songhuahulinchang, Jilin	126.93°	43.40°	258	Hap8 (5)	0	0
Total	110						0.901	0.0053

## Sheet: Table S2
Table S2. Primers for chloroplast markers used in this study
Markers	Forward or reverse primer	Primer sequence
rpl3-trnL	F	GCAAGCACACGATTTCACCTTTCT
	R	GTTAGGGATTTAGTTGTGTAGCGGATT
atpB-rbcL	F	CGATTTACGCCTAGCCTAATTGGATTT
	R	AATTCTCGCAATAACAAGGTCTACTCG
trnH-psbA	F	GTTATGCATGAACGTAATGCTC
	R	CGCGCATGGTGGATTCACAATCC
ycf1	F	AGAAGGAGAAGAAGGAATCG
	R	GACCAATTAACCAACCAACA
